# Supplementary material
Source: PubMed Central journal article supplement (PMC7953089)
Supplement: Supplemental_material.pdf [file Supplemental_material.pdf]

JVDI: Supplementary material

Gagnon CA, et al. Porcine reproductive and respiratory syndrome virus whole-genome sequencing efficacy with field clinical samples using a poly(A)-tail viral genome purification method

**Supplementary Table 1.** PRRSV WGS successful cases, high-throughput sequencing data.

| Case ID | PRRSV RT-qPCR Cq value in a sample | Type of sample | No. of animals pooled in a sample | Total reads | No. of PRRSV mapped reads | % of PRRSV mapped reads | Mean coverage |
|---------|------------------------------------|----------------|-----------------------------------|-------------|---------------------------|-------------------------|---------------|
| 1844370 | NA                                 | Serum          | 1                                 | 148,210     | 104,619                   | 70.588                  | 1,493         |
| 1890826 | 21.98                              | Serum          | 1                                 | 2,073,558   | 1,386,641                 | 66.873                  | 19,809        |
| 1926452 | 18.2                               | Lung           | 1                                 | 4,437,900   | 12,489                    | 0.281                   | 143           |
| 1927781 | 23.74                              | Serum          | 1                                 | 935,500     | 28,537                    | 3.050                   | 364           |
| 1943176 | 21.3                               | Sera           | 6                                 | 283,896     | 7,766                     | 2.736                   | 88            |
| 1943177 | 14.5                               | Sera           | 6                                 | 1,738,040   | 1,080,360                 | 62.160                  | 15,185        |
| 1943798 | 14.88                              | Sera           | 6                                 | 4,098,788   | 3,611,571                 | 88.113                  | 49,315        |
| 1951167 | 22.75                              | Sera           | 7                                 | 3,257,468   | 1,268,970                 | 38.956                  | 17,111        |
| 1952821 | 23.95                              | PoT            | 1                                 | 2,529,498   | 1,427                     | 0.056                   | 19            |
| 1953024 | 21.68                              | Sera           | 7                                 | 467,026     | 75,971                    | 16.267                  | 839           |
| 1953769 | 22.45                              | PoT            | 1                                 | 2,504,292   | 2,381                     | 0.095                   | 36            |
| 1956308 | 20.17                              | PoT            | 1                                 | 1,664,089   | 14,931                    | 0.897                   | 204           |
| 1957367 | 23.24                              | PoT            | 1                                 | 107,602     | 25,219                    | 23.437                  | 372           |
| 1961450 | 24.42                              | Sera           | 5                                 | 1,452,828   | 173,038                   | 11.910                  | 2,561         |
| 1961538 | 19.98                              | PoT            | 1                                 | 3,672,398   | 49,274                    | 1.342                   | 679           |
| 1966315 | 20.08                              | Sera           | 4                                 | 344,968     | 49,276                    | 14.284                  | 478           |

## Whole-genome sequencing of PRRSV

|         |       |       |    |           |           |        |        |
|---------|-------|-------|----|-----------|-----------|--------|--------|
| 1966316 | 18.48 | Sera  | 4  | 1099770   | 44,7562   | 40.696 | 4,632  |
| 1968868 | 34.13 | Serum | 1  | 1,543,552 | 2,504     | 0.162  | 35     |
| 1968869 | 27.08 | Serum | 1  | 1,702,286 | 361,199   | 21.218 | 4,519  |
| 1978525 | 21.79 | Sera  | 8  | 171,332   | 48,987    | 28.592 | 482    |
| 1980019 | 22.27 | Lung  | 1  | 3,380,328 | 5,649     | 0.167  | 83     |
| 1982018 | 21.15 | Lung  | 1  | 1,925,924 | 27,669    | 1.437  | 381    |
| 1982260 | 20.36 | Sera  | 10 | 998,032   | 168,453   | 16.879 | 1,866  |
| 1982353 | 18.19 | Sera  | 6  | 1,437,798 | 1,147,565 | 79.814 | 13,678 |
| 1982354 | 16.86 | Sera  | 6  | 1,610,730 | 1,129,865 | 70.146 | 10,864 |
| 1982412 | 13.89 | Lung  | 1  | 1,888,322 | 481,256   | 25.486 | 6,805  |
| 1985061 | 24.19 | Lung  | 1  | 2,064,428 | 4,239     | 0.205  | 59     |
| 1985928 | 15.25 | Serum | 1  | 35,366    | 10,304    | 29.135 | 126    |
| 1994368 | 19.7  | Lung  | 1  | 854,464   | 33,184    | 3.884  | 300    |
| 2012512 | 17.94 | Lung  | 1  | 1,427,924 | 247,213   | 17.313 | 3,210  |
| 2013955 | 22.99 | Lungs | 2  | 1,730,426 | 12,038    | 0.696  | 164    |
| 2016194 | 16.97 | Lung  | 1  | 641,910   | 98,392    | 15.328 | 1,172  |
| 2017769 | 22.23 | Lungs | 2  | 1,560,084 | 1,615     | 0.104  | 21     |
| 2018110 | 21.85 | Sera  | 5  | 3,772,466 | 3,280,540 | 86.960 | 37,953 |
| 2018114 | 19.62 | Sera  | 5  | 95,326    | 42,080    | 44.143 | 435    |
| 2020590 | 24.59 | PoT   | 1  | 1,464,302 | 3,552     | 0.243  | 46     |
| 2021685 | 21.22 | Lung  | 1  | 1,985,182 | 14,994    | 0.755  | 193    |
| 2023030 | 18.73 | Sera  | 3  | 684,202   | 487,383   | 71.234 | 5,096  |
| 2023323 | 22.55 | Lung  | 1  | 2,860,316 | 8,313     | 0.291  | 99     |
| 2029734 | 21.85 | Lung  | 1  | 1,536,754 | 2,059     | 0.134  | 25     |
| 2035290 | 22.86 | Sera  | 5  | 1,515,352 | 113,970   | 7.521  | 1,034  |
| 2048380 | 20.23 | Sera  | 10 | 1,156,950 | 52,039    | 4.498  | 495    |
| 2050445 | 20.06 | Serum | 1  | 2,901,278 | 587,223   | 20.240 | 8,348  |

## Whole-genome sequencing of PRRSV

|         |       |       |    |           |        |        |       |
|---------|-------|-------|----|-----------|--------|--------|-------|
| 2050887 | 23.52 | Sera  | 10 | 893,244   | 22,467 | 2.515  | 230   |
| 2057423 | 22.77 | Sera  | 10 | 1,222,100 | 36,670 | 3.001  | 334   |
| 2057984 | 24.4  | Sera  | 5  | 175,942   | 40,968 | 23.285 | 53    |
| 2058132 | 19.51 | PoT   | 1  | 237,606   | 10,389 | 4.372  | 137   |
| 2059368 | 18.09 | Sera  | 10 | 129,220   | 60,072 | 46.488 | 758   |
| 2059830 | 27.22 | Sera  | 5  | 92,458    | 1,571  | 1.699  | 10    |
| 2061291 | 22.58 | PoT   | 2  | 1,271,382 | 5,050  | 0.397  | 70    |
| 2063747 | 24.77 | Sera  | 2  | 78,076    | 935    | 1.198  | 14    |
| 2065929 | 26.37 | Sera  | 10 | 529,728   | 8,033  | 1.516  | 90    |
| 2067407 | 23.06 | Sera  | 5  | 179,552   | 76,297 | 0.042  | 1,002 |
| 2067408 | 24.33 | Sera  | 5  | 1,135,916 | 66,336 | 5.840  | 634   |
| 2067423 | 26.28 | Serum | 1  | 129,260   | 3,019  | 2.336  | 41    |
| 2069767 | 24.33 | PoT   | 2  | 1,124,518 | 22,100 | 1.965  | 287   |
| 2070378 | 25.98 | PoT   | 2  | 520,846   | 30,243 | 5.807  | 432   |
| 2072533 | 26.53 | Serum | 1  | 152,588   | 10,736 | 7.036  | 134   |
| 2073509 | 26.5  | Lung  | 1  | 1,798,804 | 3,096  | 0.172  | 41    |
| 2073979 | 18.83 | Sera  | 10 | 2,090,940 | 92,881 | 4.442  | 749   |
| 2075305 | 20.95 | Lung  | 1  | 723,612   | 13,719 | 1.896  | 203   |
| 2078279 | 18.19 | Sera  | 5  | 819,850   | 59,698 | 7.282  | 552   |
| 2078481 | NA    | Serum | 1  | 30,710    | 5,132  | 16.711 | 58    |
| 2082089 | 19.47 | Lung  | 1  | 439,064   | 19,620 | 4.469  | 252   |
| 2084371 | 23.98 | Lung  | 1  | 2,399,650 | 7,414  | 0.309  | 88    |
| 2087409 | 20.98 | Lung  | 1  | 1,172,768 | 4,641  | 0.396  | 61    |
| 2087619 | 21.35 | PoT   | 1  | 2,613,914 | 26,422 | 1.011  | 374   |
| 2089141 | 17.89 | PoT   | 1  | 6,251,778 | 12,888 | 0.206  | 134   |
| 2089260 | 16.81 | PoT   | 2  | 4,467,442 | 2,608  | 0.058  | 27    |
| 2092399 | 19.26 | Sera  | 2  | 1,170,672 | 2,852  | 0.244  | 29    |

## Whole-genome sequencing of PRRSV

|         |       |            |      |           |         |        |       |
|---------|-------|------------|------|-----------|---------|--------|-------|
| 2101209 | 23.53 | Sera       | 3    | 1,550,790 | 8,291   | 0.535  | 85    |
| 2101687 | 16.44 | Sera       | 5    | 693,544   | 78,940  | 11.382 | 834   |
| 2104407 | 13.57 | Serum      | 1    | 1,933,694 | 9,873   | 0.511  | 106   |
| 2104469 | NA    | Lung       | 1    | 3,057,156 | 88,502  | 2.895  | 1,071 |
| 2108625 | 19.89 | Sera       | 6    | 1,550,226 | 70,296  | 4.535  | 655   |
| 2108698 | 29.18 | Serum      | 1    | 33,476    | 7,650   | 22.852 | 111   |
| 2109640 | 17.7  | Serum      | 1    | 794,786   | 9,411   | 1.184  | 71    |
| 2125706 | 28.83 | Oral fluid | Pen* | 3,372,740 | 3,943   | 0.117  | 55    |
| 2132295 | 27.42 | Serum      | 1    | 1,749,770 | 270,942 | 15.484 | 4,030 |
| 2137004 | 29.3  | Serum      | 1    | 47,964    | 14,201  | 29.608 | 204   |
| 2137961 | 28.62 | Serum      | 1    | 1,632,382 | 19,284  | 1.181  | 271   |
| 2146871 | 24.85 | Serum      | 1    | 1,613,492 | 191,318 | 11.857 | 2,808 |
| 2147100 | 32.84 | Oral fluid | Pen  | 1,036,475 | 487,981 | 47.081 | 4,762 |
| 2153073 | 27.93 | Serum      | 1    | 485,839   | 46,014  | 9.471  | 443   |
| 2154774 | 11.5  | Serum      | 1    | 1,221,852 | 77,485  | 6.342  | 556   |
| 2158115 | 18.77 | Serum      | 1    | 395,810   | 1,258   | 0.318  | 13    |
| 2158116 | 17.24 | Serum      | 1    | 1,128,925 | 84,829  | 7.514  | 817   |
| 2126306 | 21.35 | PoT        | 2    | 2,423,832 | 2,376   | 0.098  | 33    |
| 2153250 | 23.3  | Sera       | 9    | 1,184,256 | 105,787 | 8.933  | 1,492 |
| 2172065 | 22.1  | Sera       | NA   | 748,088   | 79,475  | 10.624 | 1,138 |
| 2164092 | 19.14 | Lung       | 2    | 6,222,062 | 10,670  | 0.171  | 160   |
| 2190451 | 26.66 | Sera       | 5    | 716,850   | 4,584   | 0.639  | 43    |
| 2190452 | 25.45 | Sera       | 5    | 659,272   | 9,371   | 1.421  | 86    |
| 2191288 | NA    | Sera       | 10   | 353,150   | 136,394 | 38.622 | 1,517 |
| 2206200 | 14.75 | PoT        | 1    | 3,651,528 | 17,109  | 0.469  | 198   |
| 2206201 | 16.51 | PoT        | 1    | 2,384,358 | 15,394  | 0.646  | 292   |
| 2208392 | 18.51 | Sera       | 10   | 614,140   | 44,917  | 7.314  | 506   |

Whole-genome sequencing of PRRSV

|         |       |       |   |           |        |        |     |
|---------|-------|-------|---|-----------|--------|--------|-----|
| 2210458 | 15.99 | PoT   | 1 | 1,788,710 | 16,412 | 0.918  | 175 |
| 2236039 | NA    | Serum | 1 | 217,310   | 60,139 | 27.674 | 794 |
| 2236850 | 20.52 | Serum | 1 | 282,080   | 38,646 | 13.700 | 403 |

Cq = cycle quantification; NA = not available; PoT = pool of tissues (includes mainly lungs with several other type of tissues such as lymph nodes, spleen, liver, intestine); PRRSV = porcine reproductive and respiratory syndrome virus; RT-qPCR = reverse-transcription quantitative PCR; WGS = whole-genome sequencing.

\* The number of animals per pen during oral fluid sampling is unknown.
